# Supplementary material for: Hydrosilane-promoted cyclization of 2-aminothiophenols by CO2to benzothiazoles
Source: Royal Society of Chemistry journal article supplement (doi:10.1039/c4ra09372k), 2014-10-27
Supplement: c4ra09372k1.pdf [file c4ra09372k1.pdf]

## SUPPORTING INFORMATION

### **Hydrosilane-Promoted Cyclization of 2-Aminothiophenols by CO<sub>2</sub> to Benzothiazoles**

**Xiang Gao, Bo Yu, Yanfei Zhao, Leiduan Hao and Zhimin Liu**✉

Beijing National Laboratory for Molecular Sciences, Key Laboratory of Colloid, Interface  
and Chemical Thermodynamics, Institute of Chemistry, Chinese Academy of Sciences,  
Beijing 100190, China. Fax: 8610-62562821; E-mail: [liuzm@iccas.ac.cn](mailto:liuzm@iccas.ac.cn).

#### **This file includes:**

1. Materials
2. Synthesis of 2-amino-5-methylbenzenethiol and 2-amino-5-methoxybenzenethiol
3. Synthesis of Benzothiazoles
4. NMR data of the as-prepared products
5. References

## 1. Materials

CO<sub>2</sub> (99.99%) was provided by Beijing Analytical Instrument Company. 2-Aminothiophenol (1a: 98%), 2-amino-4-chlorothiophenol (1e: 97%), 2-amino-6-methylbenzothiazole (98%), 2-amino-6-methoxybenzothiazole (99%), TBD (1,5,7-triazabicyclo[4.4.0]dec-5-ene, 98%), NMP (1-methyl-2-pyrrolidinone) were purchased from J&K Scientific Ltd. DBU (1,8-diazabicyclo[5.4.0]undec-7-ene, 98%), DBN (1,5-diazabicyclo[4.3.0]non-5-ene, 98%), PMHS (poly(methylhydrosiloxane), ca 1900), Et<sub>2</sub>SiH<sub>2</sub> (diethylsilane, 98%), Et<sub>3</sub>SiH (triethylsilane, 99%), 4-nitroacetophenone (98%) were purchased from Alfa Aesar. 2-Amino-5-bromobenzenethiol (1d: 98%), 2-Amino-5-nitrobenzenethiol (1f: 98%) were purchased from Beijing Kaida Technology Development Co., Ltd. The deuterated solvent (DMSO-d<sub>6</sub>) was obtained from Cambridge Isotope Laboratories, Inc. 2-Amino-5-methylbenzenethiol (1b) and 2-amino-5-methoxybenzenethiol (1c) were synthesized according to the published procedures, the other chemicals were used as received.

## 2. Synthesis of 2-amino-5-methylbenzenethiol (1b) and 2-amino-5-methoxybenzenethiol (1c)

2-Amino-5-methylbenzenethiol (1b) and 2-amino-5-methoxybenzenethiol (1c) were synthesized according to the published procedures.<sup>1-3</sup> The mixture of 2-amino-6-methylbenzothiazole (10 mmol) and KOH (100 mmol) in H<sub>2</sub>O (20 mL) was heated at 120 °C. The mixture was kept on reflux for 24 h and then cooled to room temperature. The mixture was filtered to remove the scraps and the filtrate was neutralized by acetic acid (50% in water) to pH = 6. Finally, the precipitate was collected by filtration and the target compound 1b was obtained as a light yellow solid. Similarly, compound 1c was obtained by the same method using 2-amino-6-methoxybenzothiazole as raw material and it was a yellow green solid.

## 3. Synthesis of benzothiazoles

The cyclization of 2-aminothiophenol by CO<sub>2</sub> in the presence of hydrosilane was conducted in a 22 ml Teflon-lined stainless steel autoclave equipped with a magnetic stirrer. In a typical experiment to synthesize benzothiazole, 2-aminothiophenol (2 mmol, 0.2504 g), DBN (1 equiv, 0.2483 g), Et<sub>2</sub>SiH<sub>2</sub> (1.5 equiv, 0.2645 g) and NMP (2 mL) were successively added into the reactor, and then CO<sub>2</sub> was charged into the reactor until the desired pressure (5 MPa) at room temperature. Subsequently, the reactor was moved into an oil bath of desired temperature (150 °C) and the stirrer started. After a certain time (24 h), the reactor was moved to ice water and CO<sub>2</sub> was slowly released. The product yields were determined by <sup>1</sup>H NMR using 4-nitroacetophenone as the internal standard of the crude mixture.

Similarly, the other benzothiazole derivatives were obtained using the corresponding substituted 2-aminothiophenols as the substrates. The pure products were obtained via column chromatography separation and characterized by NMR. The yields were the isolated products. <sup>1</sup>H NMR (400 MHz) and <sup>13</sup>C NMR (100 MHz) study was carried out with a Bruker Avance III 400 HD spectrometer with DMSO-d<sub>6</sub> as the solvent at ambient temperature.

#### 4. NMR data of the as-prepared products

The characterization data for the as-prepared products were identical to the previously reported in the literature.

##### Compound 2 (benzothiazolone):

$^1\text{H}$  NMR (400 MHz, DMSO)  $\delta$  11.87 (s, 1H), 7.54 (d,  $J = 7.9$  Hz, 1H), 7.26 (t,  $J = 7.6$  Hz, 1H), 7.11 (d,  $J = 4.9$  Hz, 2H).

$^{13}\text{C}$  NMR (100 MHz, DMSO)  $\delta$  170.47, 136.79, 126.85, 123.76, 123.14, 123.04, 111.94.

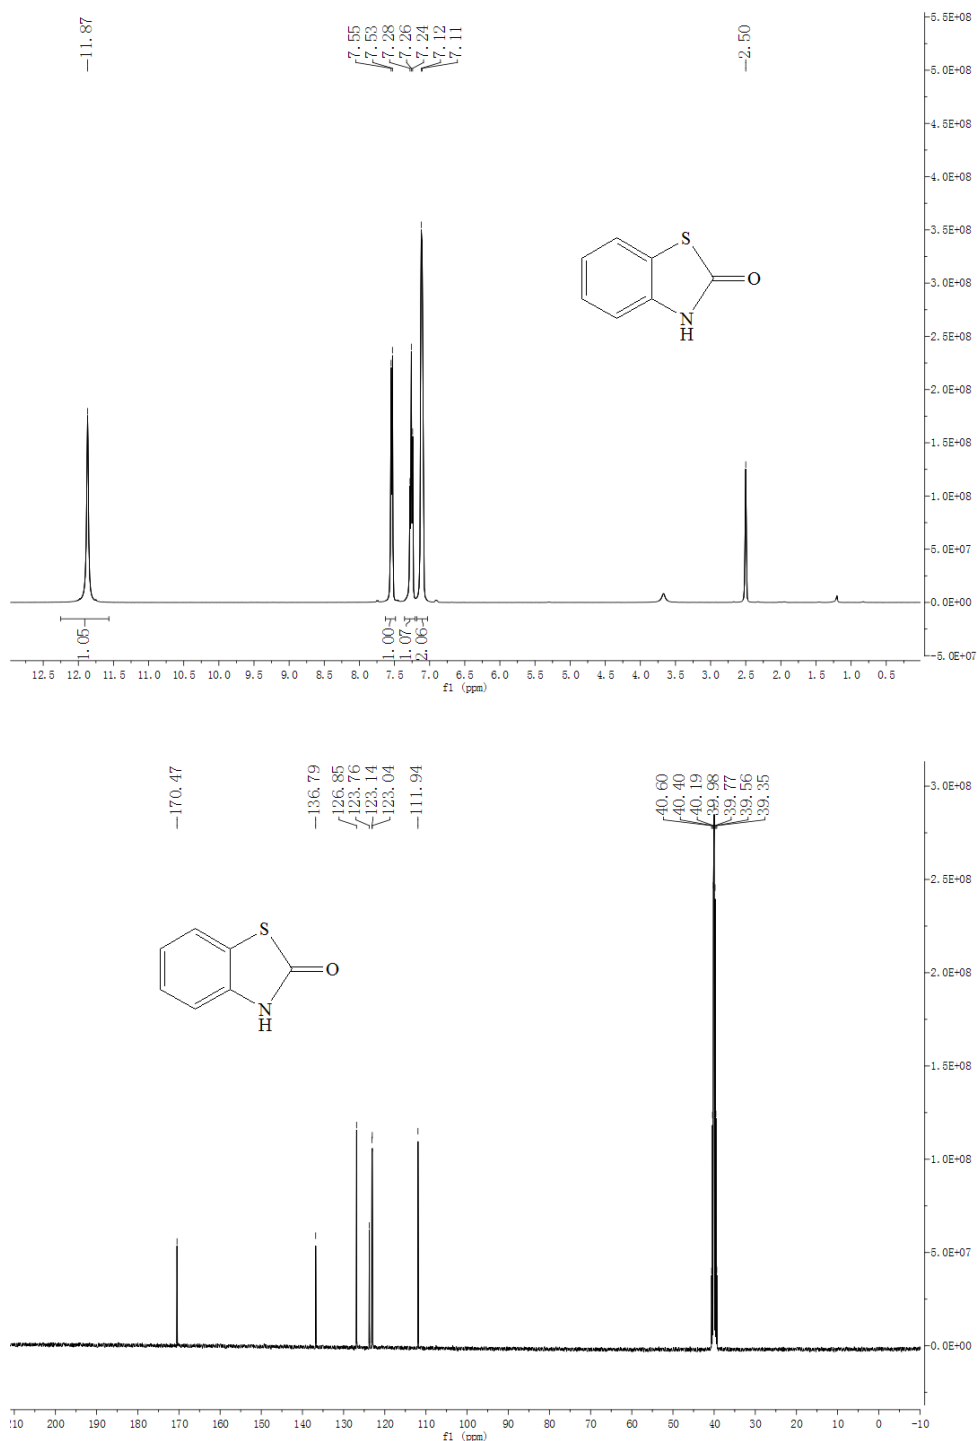

Figure S1.  $^1\text{H}$  NMR and  $^{13}\text{C}$  NMR spectra of benzothiazolone

**Compound 1b (2-amino-5-methylbenzenethiol):**

$^1\text{H}$  NMR (400 MHz, DMSO)  $\delta$  6.92 (d,  $J = 8.1$  Hz, 1H), 6.81 (s, 1H), 6.65 (d,  $J = 8.1$  Hz, 1H), 5.22 (s, 2H), 2.05 (s, 3H).

$^{13}\text{C}$  NMR (100 MHz, DMSO)  $\delta$  147.84, 136.08, 132.35, 125.02, 117.12, 115.36, 20.13.

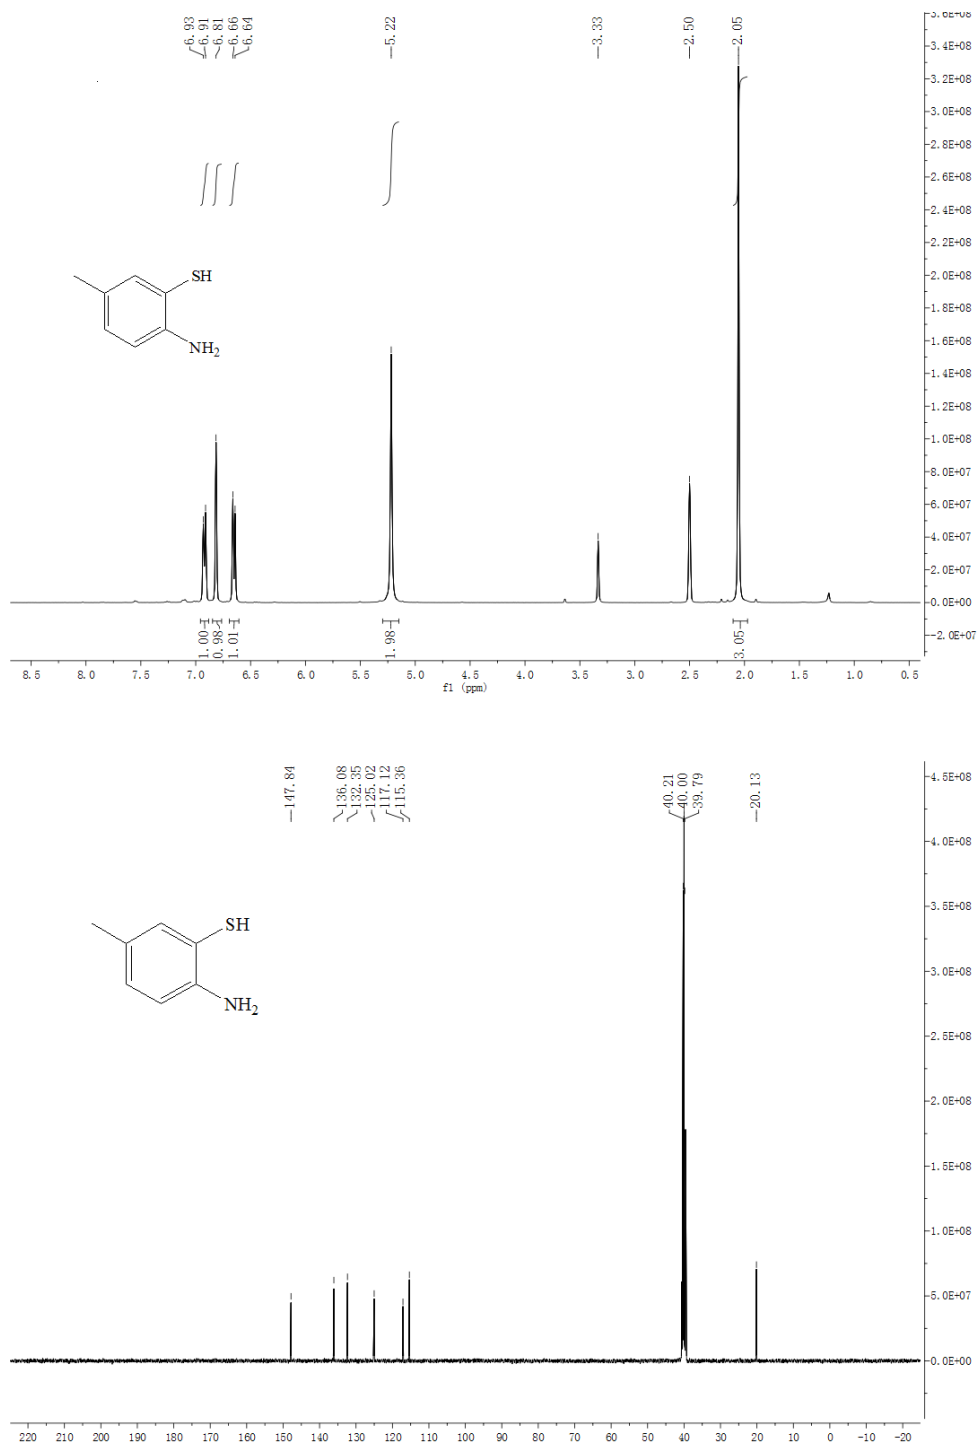

**Figure S2.**  $^1\text{H}$  NMR and  $^{13}\text{C}$  NMR spectra of 2-amino-5-methylbenzenethiol

**Compound 1c (2-amino-5-methoxybenzenethiol):**

$^1\text{H NMR}$  (400 MHz, DMSO)  $\delta$  6.78 (dd,  $J = 8.8, 2.8$  Hz, 1H), 6.72 (d,  $J = 8.8$  Hz, 1H), 6.61 (d,  $J = 2.8$  Hz, 1H), 5.05 (s, 2H), 3.54 (s, 3H).

$^{13}\text{C NMR}$  (100 MHz, DMSO)  $\delta$  150.60, 144.15, 119.12, 119.00, 117.56, 116.61, 55.74.

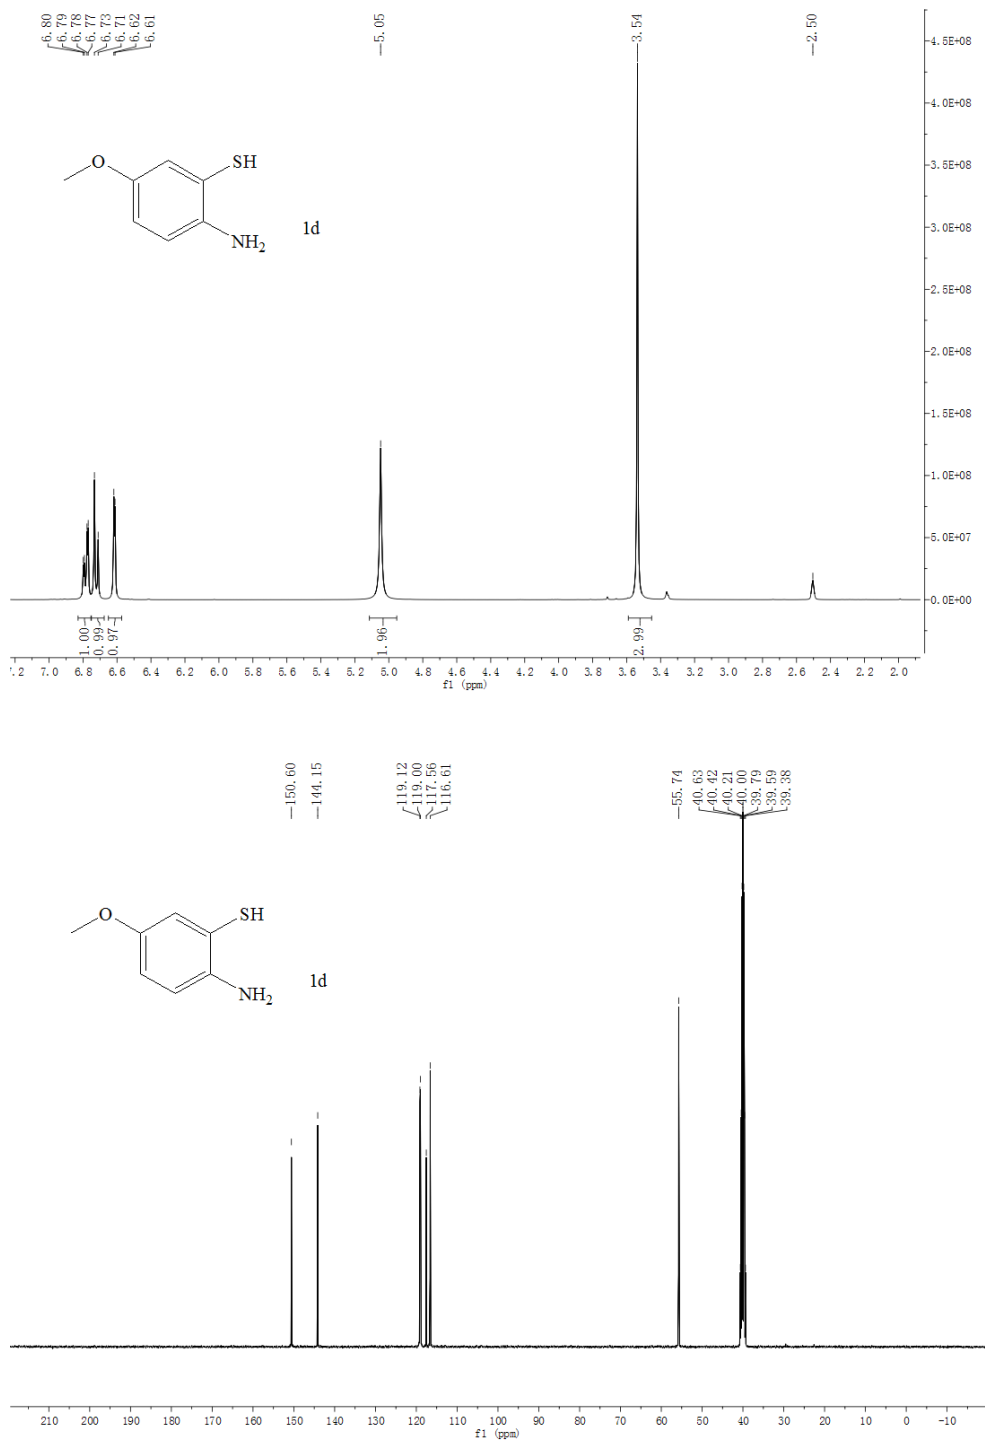

**Figure S3.**  $^1\text{H NMR}$  and  $^{13}\text{C NMR}$  spectra of 2-amino-5-methoxybenzenethiol

**Compound 2A (benzothiazole):**

$^1\text{H}$  NMR (400 MHz, DMSO)  $\delta$  9.41 (s, 1H), 8.12 (dd,  $J$  = 8.1, 2.8 Hz, 2H), 7.48 (m, 2H).

$^{13}\text{C}$  NMR (100 MHz, DMSO)  $\delta$  156.26, 153.50, 134.03, 126.50, 125.80, 123.48, 122.79.

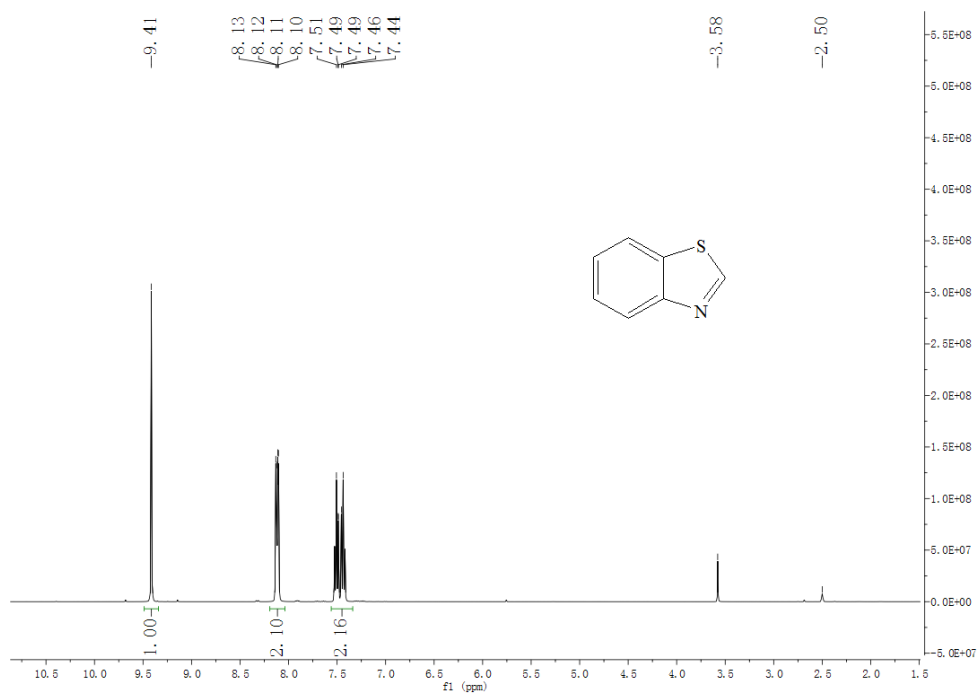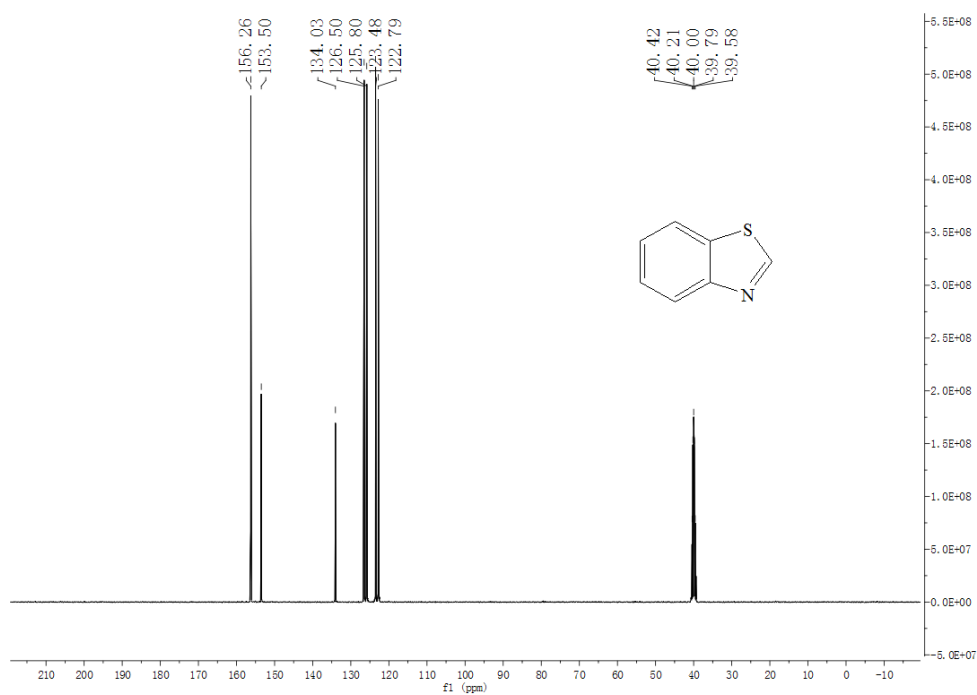

**Figure S4.**  $^1\text{H}$  NMR and  $^{13}\text{C}$  NMR spectra of benzothiazole

**Compound 2B (5-methylbenzothiazole):**

$^1\text{H}$  NMR (400 MHz, DMSO)  $\delta$  9.29 (s, 1H), 8.04-7.84 (m, 2H), 7.33 (d,  $J = 7.8$  Hz, 1H), 2.43 (s, 3H).

$^{13}\text{C}$  NMR (100 MHz, DMSO)  $\delta$  155.24, 151.71, 135.62, 134.19, 128.13, 123.00, 122.35, 21.44.

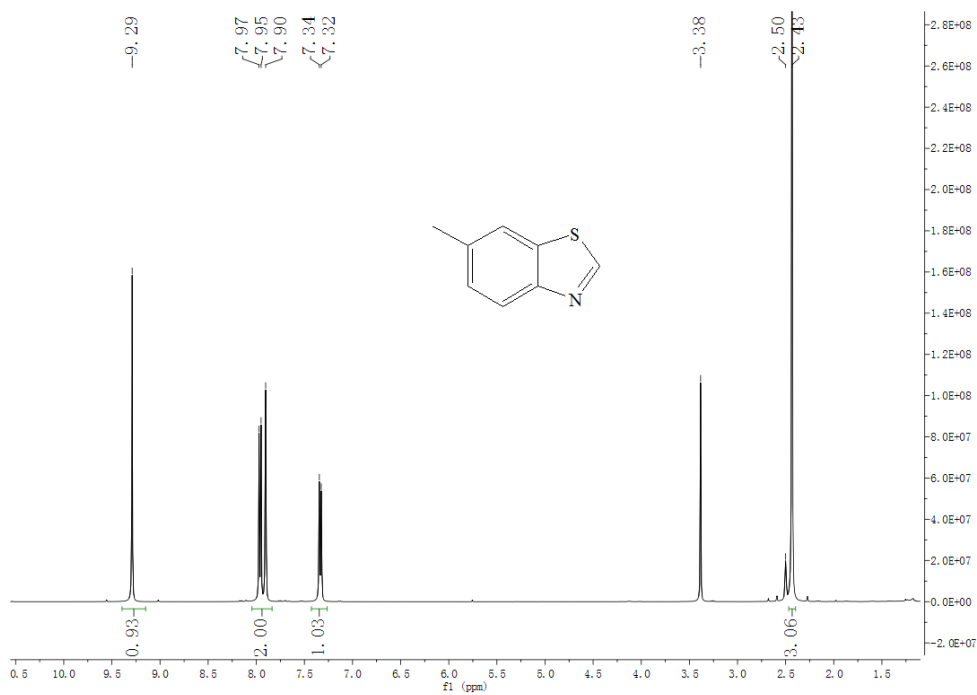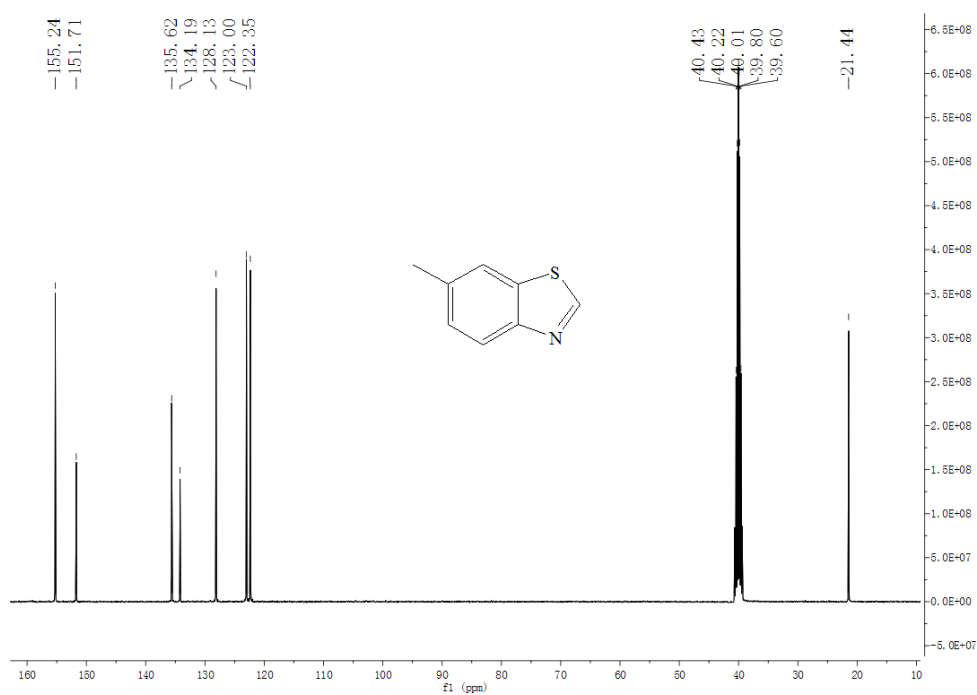

**Figure S5.**  $^1\text{H}$  NMR and  $^{13}\text{C}$  NMR spectra of 5-methylbenzothiazole

**Compound 2C (5-methoxybenzothiazole):**

$^1\text{H NMR}$  (400 MHz, DMSO)  $\delta$  9.18 (s, 1H), 7.96 (d,  $J = 8.9$  Hz, 1H), 7.72 (d,  $J = 2.5$  Hz, 1H), 7.13 (dd,  $J = 8.9$ , 2.5 Hz, 1H), 3.84 (s, 3H).

$^{13}\text{C NMR}$  (100 MHz, DMSO)  $\delta$  157.97, 153.78, 148.01, 135.53, 123.89, 116.15, 105.20, 56.17.

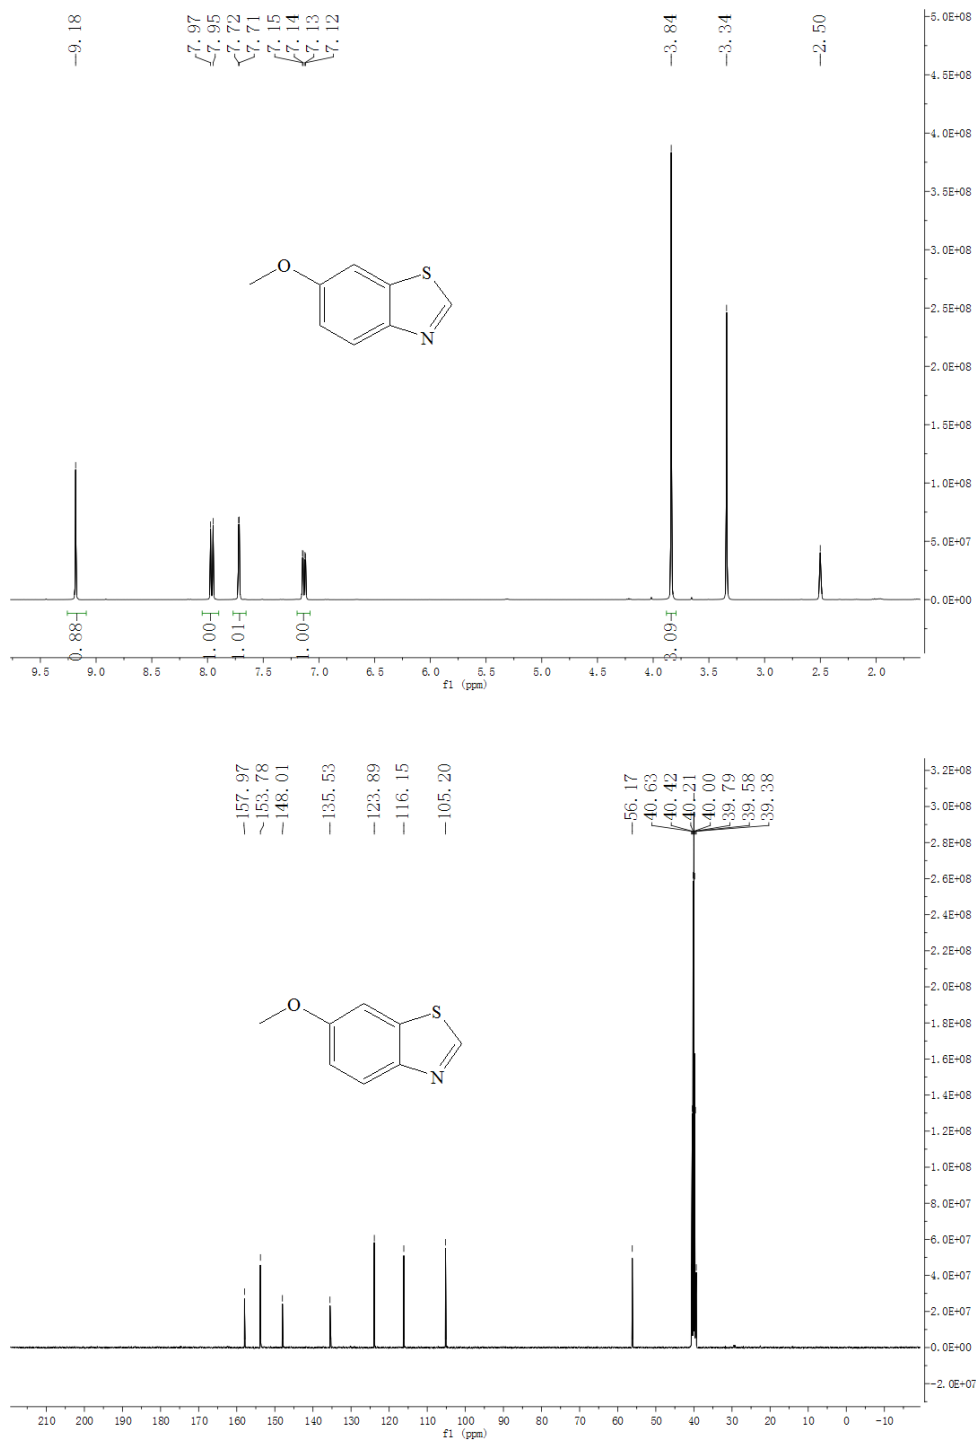

**Figure S6.**  $^1\text{H NMR}$  and  $^{13}\text{C NMR}$  spectra of 5-methoxybenzothiazole



**Compound 2D (5- bromobenzothiazole):**

$^1\text{H}$  NMR (400 MHz, DMSO)  $\delta$  9.40 (s, 1H), 8.47 (d,  $J$  = 1.8 Hz, 1H), 8.03 (d,  $J$  = 8.7 Hz, 1H), 7.69 (dd,  $J$  = 8.7, 1.9 Hz, 1H).

$^{13}\text{C}$  NMR (100 MHz, DMSO)  $\delta$  157.79, 152.57, 136.22, 129.83, 125.55, 125.03, 118.73.

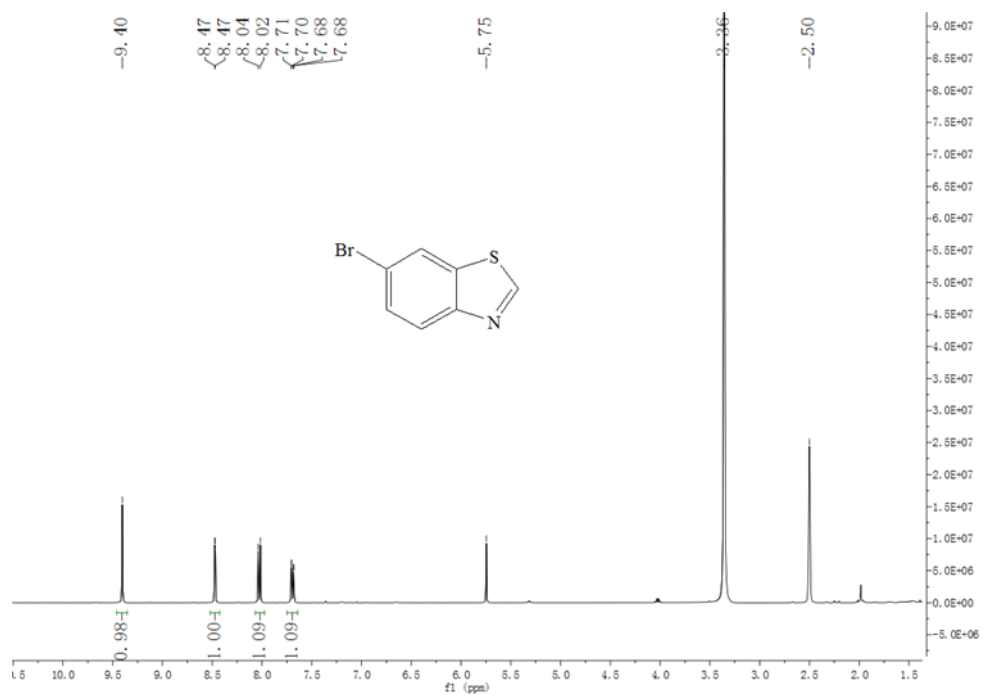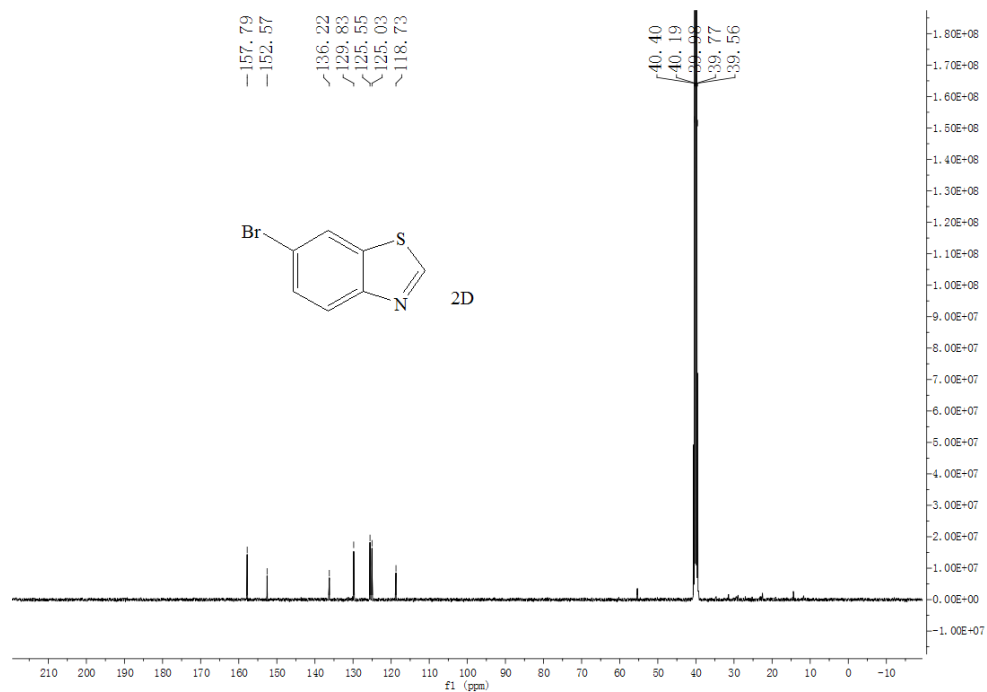

**Figure S7.**  $^1\text{H}$  NMR and  $^{13}\text{C}$  NMR spectra of 5- bromobenzothiazole

**Compound 2E (6-chlorobenzothiazole):**

$^1\text{H}$  NMR (400 MHz, DMSO)  $\delta$  9.47 (s, 1H), 8.19 (dd,  $J = 16.2, 5.2$  Hz, 2H), 7.54 (dd,  $J = 8.6, 1.9$  Hz, 1H).

$^{13}\text{C}$  NMR (100 MHz, DMSO)  $\delta$  159.10, 154.47, 132.93, 131.49, 126.11, 124.48, 122.96.

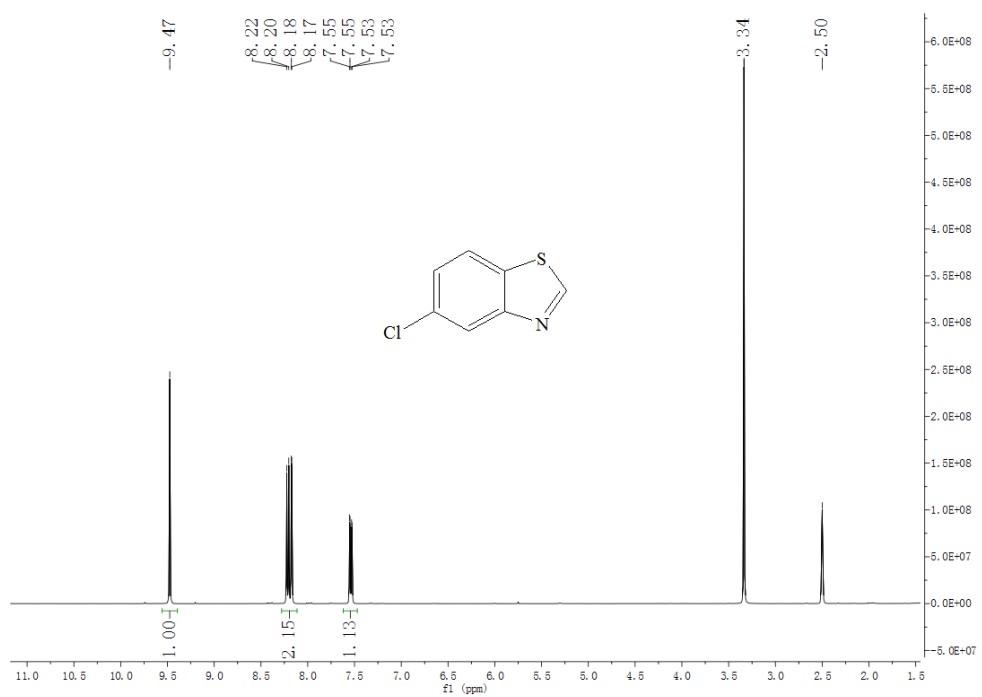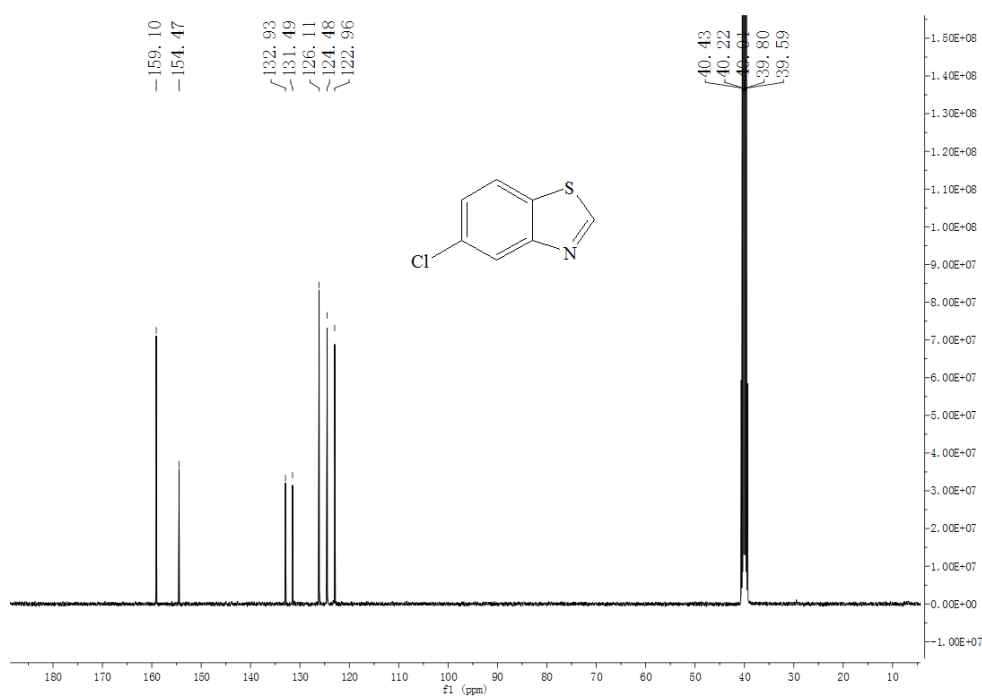

**Figure S8.**  $^1\text{H}$  NMR and  $^{13}\text{C}$  NMR spectra of 6-chlorobenzothiazole

**Compound 2F (5-aminobenzothiazole):**

$^1\text{H}$  NMR (400 MHz, DMSO)  $\delta$  8.87 (s, 1H), 7.70 (d,  $J = 8.7$  Hz, 1H), 7.11 (d,  $J = 2.0$  Hz, 1H), 6.79 (dd,  $J = 8.7$ , 2.1 Hz, 1H), 5.38 (s, 2H).

$^{13}\text{C}$  NMR (100 MHz, DMSO)  $\delta$  149.61, 147.78, 145.25, 135.51, 123.55, 115.38, 104.26.

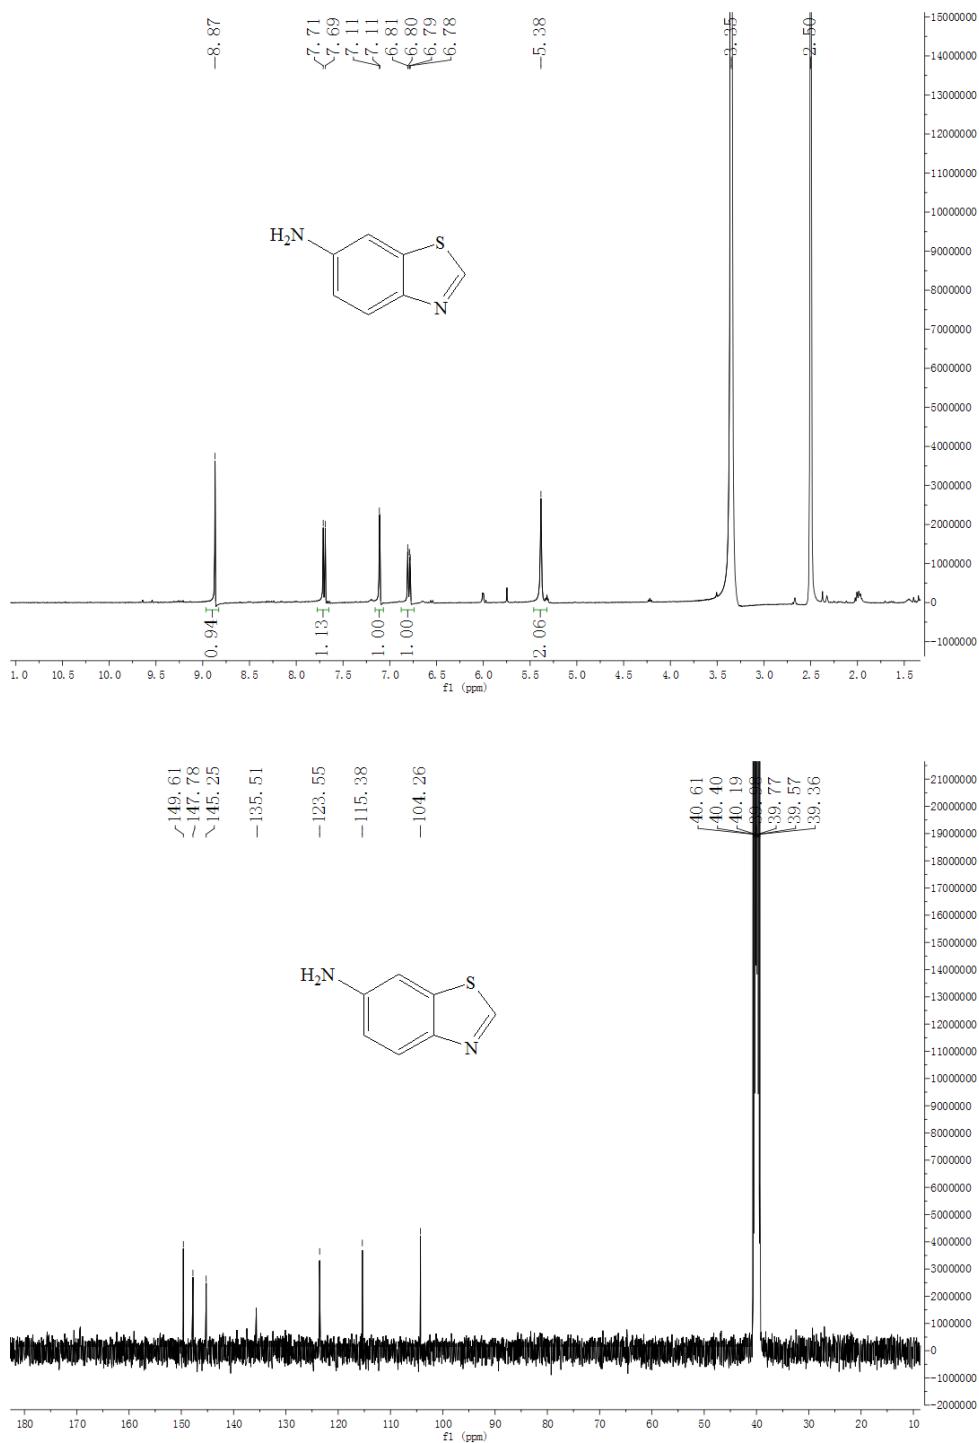

**Figure S9.**  $^1\text{H}$  NMR and  $^{13}\text{C}$  NMR spectra of 5-aminobenzothiazole

## 5. References

- 1 S. Tzanopoulou, M. Sagnou, M. Paravatou-Petsotas, E. Gourni, G. Loudos, S. Xanthopoulos, D. Lafkas, H. Kiaris, A. Varvarigou, I. C. Pirmettis, M. Papadopoulos and M. Pelecanou, *J. Med. Chem.*, 2010, **53**, 4633-4641.
- 2 M. Cui, X. Wang, P. Yu, J. Zhang, Z. Li, X. Zhang, Y. Yang, M. Ono, H. Jia, H. Saji and B. Liu, *J. Med. Chem.*, 2012, **55**, 9283-9296.
- 3 C. A. Mathis, Y. Wang, D. P. Holt, G.-F. Huang, M. L. Debnath and W. E. Klunk, *J. Med. Chem.*, 2003, **46**, 2740-2754.
